# Supplementary material for: Development of a nano-QSPR model to predict band gaps of spherical metal oxide nanoparticles
Source: Royal Society of Chemistry journal article supplement (doi:10.1039/c8ra10226k), 2019-01-01
Supplement: c8ra10226k1.pdf [file c8ra10226k1.pdf]

**Table S1. Band gaps of metal oxide nanoparticles from literature and experiments**

| <b>Metal oxide</b>             | $\alpha$ (°) | $\beta$ (°) | $\gamma$ (°) | $a$ (Å) | $b$ (Å) | $c$ (Å) | <b>Size (nm)</b> | <b><math>E_g</math> (eV)<br/>(Exp.)</b> | <b>Reference</b> |
|--------------------------------|--------------|-------------|--------------|---------|---------|---------|------------------|-----------------------------------------|------------------|
| Al <sub>2</sub> O <sub>3</sub> | 90           | 90          | 120          | 4.81    | 4.81    | 13.12   | 66.0             | 5.97                                    | 19               |
| Al <sub>2</sub> O <sub>3</sub> | 90           | 90          | 120          | 4.81    | 4.81    | 13.12   | 86.0             | 5.97                                    | 20               |
| CeO <sub>2</sub>               | 90           | 90          | 90           | 5.46    | 5.46    | 5.46    | 12.0             | 3.39                                    | 21               |
| CeO <sub>2</sub>               | 90           | 90          | 90           | 5.46    | 5.46    | 5.46    | 3.6              | 3.68                                    | 21               |
| CeO <sub>2</sub>               | 90           | 90          | 90           | 5.46    | 5.46    | 5.46    | 2.6              | 3.44                                    | 21               |
| Cr <sub>2</sub> O <sub>3</sub> | 90           | 90          | 120          | 4.58    | 4.58    | 14.72   | 35.1             | 3.78                                    | 22               |
| Cr <sub>2</sub> O <sub>3</sub> | 90           | 90          | 120          | 4.58    | 4.58    | 14.72   | 38.1             | 3.72                                    | 22               |
| Cr <sub>2</sub> O <sub>3</sub> | 90           | 90          | 120          | 4.58    | 4.58    | 14.72   | 40.3             | 3.67                                    | 22               |
| Cr <sub>2</sub> O <sub>3</sub> | 90           | 90          | 120          | 4.58    | 4.58    | 14.72   | 25.0             | 4.33                                    | 23               |
| Cr <sub>2</sub> O <sub>3</sub> | 90           | 90          | 120          | 4.58    | 4.58    | 14.72   | 28.0             | 4.11                                    | 23               |
| Cr <sub>2</sub> O <sub>3</sub> | 90           | 90          | 120          | 4.58    | 4.58    | 14.72   | 34.0             | 3.81                                    | 23               |
| Cr <sub>2</sub> O <sub>3</sub> | 90           | 90          | 120          | 4.58    | 4.58    | 14.72   | 35.0             | 3.78                                    | 23               |
| Cr <sub>2</sub> O <sub>3</sub> | 90           | 90          | 120          | 4.58    | 4.58    | 14.72   | 40.0             | 3.62                                    | 23               |
| Cr <sub>2</sub> O <sub>3</sub> | 90           | 90          | 120          | 4.58    | 4.58    | 14.72   | 45.0             | 3.54                                    | 23               |
| Cu <sub>2</sub> O              | 90           | 90          | 90           | 4.31    | 4.31    | 4.31    | 4.0              | 2.90                                    | 24               |
| Cu <sub>2</sub> O              | 90           | 90          | 90           | 4.31    | 4.31    | 4.31    | 9.0              | 2.50                                    | 24               |
| Cu <sub>2</sub> O              | 90           | 90          | 90           | 4.31    | 4.31    | 4.31    | 6.0              | 2.83                                    | 25               |
| Cu <sub>2</sub> O              | 90           | 90          | 90           | 4.31    | 4.31    | 4.31    | 20.0             | 2.04                                    | 24               |
| Fe <sub>2</sub> O <sub>3</sub> | 90           | 90          | 120          | 4.74    | 4.74    | 13.49   | 100.0            | 2.05                                    | 26               |
| Fe <sub>2</sub> O <sub>3</sub> | 90           | 90          | 120          | 4.74    | 4.74    | 13.49   | 100.0            | 2.12                                    | 26               |
| Fe <sub>2</sub> O <sub>3</sub> | 90           | 90          | 120          | 4.74    | 4.74    | 13.49   | 100.0            | 2.46                                    | 26               |
| Fe <sub>2</sub> O <sub>3</sub> | 90           | 90          | 120          | 4.74    | 4.74    | 13.49   | 100.0            | 2.88                                    | 26               |
| Fe <sub>3</sub> O <sub>4</sub> | 90           | 90          | 90           | 8.04    | 8.04    | 8.04    | 12.0             | 1.85                                    | 3                |
| Ga <sub>2</sub> O <sub>3</sub> | 90           | 103.7       | 90           | 12.50   | 3.10    | 5.92    | 2.5              | 5.10                                    | 27               |
| Ga <sub>2</sub> O <sub>3</sub> | 90           | 103.7       | 90           | 12.50   | 3.10    | 5.92    | 70.0             | 4.90                                    | 28               |
| Ga <sub>2</sub> O <sub>3</sub> | 90           | 103.7       | 90           | 12.50   | 3.10    | 5.92    | 60.0             | 4.80                                    | 29               |
| HfO <sub>2</sub>               | 90           | 99.216      | 90           | 5.14    | 5.19    | 5.31    | 17.0             | 6.07                                    | 30               |
| In <sub>2</sub> O <sub>3</sub> | 90           | 90          | 90           | 10.35   | 10.35   | 10.35   | 17.4             | 3.84                                    | 31               |
| In <sub>2</sub> O <sub>3</sub> | 90           | 90          | 90           | 10.35   | 10.35   | 10.35   | 16.6             | 3.86                                    | 31               |
| La <sub>2</sub> O <sub>3</sub> | 90           | 90          | 120          | 3.94    | 3.94    | 6.18    | 20.0             | 5.77                                    | 3                |
| La <sub>2</sub> O <sub>3</sub> | 90           | 90          | 120          | 3.94    | 3.94    | 6.18    | 40.0             | 4.20                                    | 32               |
| MgO                            | 90           | 90          | 90           | 4.25    | 4.25    | 4.25    | 7.0              | 4.27                                    | 33               |
| Mn <sub>2</sub> O <sub>3</sub> | 90           | 90          | 90           | 9.03    | 9.03    | 9.03    | 30.2             | 3.27                                    | 34               |
| NiO                            | 90           | 90          | 90           | 4.16    | 4.16    | 4.16    | 3.5              | 3.67                                    | 35               |
| NiO                            | 90           | 90          | 90           | 4.16    | 4.16    | 4.16    | 4.6              | 3.63                                    | 35               |
| NiO                            | 90           | 90          | 90           | 4.16    | 4.16    | 4.16    | 5.5              | 3.62                                    | 35               |
| NiO                            | 90           | 90          | 90           | 4.16    | 4.16    | 4.16    | 10.1             | 3.62                                    | 35               |
| NiO                            | 90           | 90          | 90           | 4.16    | 4.16    | 4.16    | 12.4             | 3.61                                    | 35               |
| NiO                            | 90           | 90          | 90           | 4.16    | 4.16    | 4.16    | 8.3              | 3.22                                    | 36               |
| NiO                            | 90           | 90          | 90           | 4.16    | 4.16    | 4.16    | 11.6             | 3.24                                    | 36               |

|                                |    |       |     |       |       |       |       |      |      |
|--------------------------------|----|-------|-----|-------|-------|-------|-------|------|------|
| NiO                            | 90 | 90    | 90  | 4.16  | 4.16  | 4.16  | 18.3  | 3.34 | 36   |
| NiO                            | 90 | 90    | 90  | 4.16  | 4.16  | 4.16  | 20.7  | 3.19 | 36   |
| NiO                            | 90 | 90    | 90  | 4.16  | 4.16  | 4.16  | 31.0  | 3.41 | 36   |
| NiO                            | 90 | 90    | 90  | 4.16  | 4.16  | 4.16  | 43.4  | 3.21 | 36   |
| Sb <sub>2</sub> O <sub>3</sub> | 90 | 90    | 90  | 5.18  | 16.61 | 5.51  | 11.8  | 4.49 | 3    |
| SnO <sub>2</sub>               | 90 | 90    | 90  | 4.83  | 4.83  | 3.24  | 4.5   | 4.20 | 37   |
| SnO <sub>2</sub>               | 90 | 90    | 90  | 4.83  | 4.83  | 3.24  | 4.0   | 4.10 | 38   |
| SnO <sub>2</sub>               | 90 | 90    | 90  | 4.83  | 4.83  | 3.24  | 5.0   | 4.21 | 39   |
| SnO <sub>2</sub>               | 90 | 90    | 90  | 4.83  | 4.83  | 3.24  | 5.2   | 4.20 | 40   |
| SnO <sub>2</sub>               | 90 | 90    | 90  | 4.83  | 4.83  | 3.24  | 3.7   | 4.33 | 40   |
| SnO <sub>2</sub>               | 90 | 90    | 90  | 4.83  | 4.83  | 3.24  | 62.4  | 4.00 | 3    |
| SnO <sub>2</sub>               | 90 | 90    | 90  | 4.83  | 4.83  | 3.24  | 12.8  | 3.40 | 41   |
| SnO <sub>2</sub>               | 90 | 90    | 90  | 4.83  | 4.83  | 3.24  | 29.1  | 3.16 | 41   |
| SnO <sub>2</sub>               | 90 | 90    | 90  | 4.83  | 4.83  | 3.24  | 37.0  | 3.35 | 40   |
| SnO <sub>2</sub>               | 90 | 90    | 90  | 4.83  | 4.83  | 3.24  | 8.0   | 4.26 | 42   |
| SnO <sub>2</sub>               | 90 | 90    | 90  | 4.83  | 4.83  | 3.24  | 15.0  | 4.00 | 42   |
| SnO <sub>2</sub>               | 90 | 90    | 90  | 4.83  | 4.83  | 3.24  | 17.0  | 3.90 | 42   |
| TiO <sub>2</sub> -a            | 90 | 90    | 90  | 3.82  | 3.82  | 9.70  | 5.0   | 3.18 | exp. |
| TiO <sub>2</sub> -a            | 90 | 90    | 90  | 3.82  | 3.82  | 9.70  | 25.0  | 3.23 | exp. |
| TiO <sub>2</sub> -a            | 90 | 90    | 90  | 3.82  | 3.82  | 9.70  | 40.0  | 3.21 | exp. |
| TiO <sub>2</sub> -a            | 90 | 90    | 90  | 3.82  | 3.82  | 9.70  | 12.6  | 3.33 | 3    |
| TiO <sub>2</sub> -a            | 90 | 90    | 90  | 3.82  | 3.82  | 9.70  | 9.8   | 3.21 | 43   |
| TiO <sub>2</sub> -a            | 90 | 90    | 90  | 3.82  | 3.82  | 9.70  | 16.0  | 3.25 | 43   |
| TiO <sub>2</sub> -a            | 90 | 90    | 90  | 3.82  | 3.82  | 9.70  | 3.9   | 3.26 | 43   |
| TiO <sub>2</sub> -a            | 90 | 90    | 90  | 3.82  | 3.82  | 9.70  | 10.6  | 3.26 | 43   |
| TiO <sub>2</sub> -a            | 90 | 90    | 90  | 3.82  | 3.82  | 9.70  | 16.9  | 3.25 | 43   |
| TiO <sub>2</sub> -a            | 90 | 90    | 90  | 3.82  | 3.82  | 9.70  | 9.3   | 3.25 | 43   |
| TiO <sub>2</sub> -a            | 90 | 90    | 90  | 3.82  | 3.82  | 9.70  | 5.0   | 3.22 | 43   |
| TiO <sub>2</sub> -a            | 90 | 90    | 90  | 3.82  | 3.82  | 9.70  | 7.9   | 3.25 | 43   |
| TiO <sub>2</sub> -a            | 90 | 90    | 90  | 3.82  | 3.82  | 9.70  | 9.2   | 3.28 | 43   |
| TiO <sub>2</sub> -a            | 90 | 90    | 90  | 3.82  | 3.82  | 9.70  | 18.0  | 3.24 | 43   |
| TiO <sub>2</sub> -a            | 90 | 90    | 90  | 3.82  | 3.82  | 9.70  | 12.3  | 3.25 | 43   |
| TiO <sub>2</sub> -a            | 90 | 90    | 90  | 3.82  | 3.82  | 9.70  | 7.8   | 3.24 | 43   |
| TiO <sub>2</sub> -a            | 90 | 90    | 90  | 3.82  | 3.82  | 9.70  | 7.4   | 3.24 | 43   |
| TiO <sub>2</sub> -a            | 90 | 90    | 90  | 3.82  | 3.82  | 9.70  | 17.0  | 3.23 | 43   |
| TiO <sub>2</sub> -a            | 90 | 90    | 90  | 3.82  | 3.82  | 9.70  | 12.4  | 3.25 | 43   |
| TiO <sub>2</sub> -a            | 90 | 90    | 90  | 3.82  | 3.82  | 9.70  | 16.7  | 3.27 | 43   |
| TiO <sub>2</sub> -b            | 90 | 90    | 90  | 9.28  | 5.52  | 5.19  | 7.9   | 3.48 | 44   |
| TiO <sub>2</sub> -b            | 90 | 90    | 90  | 9.28  | 5.52  | 5.19  | 18.9  | 3.11 | 45   |
| TiO <sub>2</sub> -r            | 90 | 90    | 90  | 4.66  | 4.66  | 2.97  | 40.0  | 3.00 | exp. |
| TiO <sub>2</sub> -r            | 90 | 90    | 90  | 4.66  | 4.66  | 2.97  | 100.0 | 3.00 | exp. |
| WO <sub>3</sub>                | 90 | 91.75 | 90  | 5.39  | 5.36  | 7.84  | 42.0  | 2.77 | 46   |
| Y <sub>2</sub> O <sub>3</sub>  | 90 | 90    | 90  | 10.65 | 10.65 | 10.65 | 14.6  | 5.30 | 47   |
| ZnO                            | 90 | 90    | 120 | 3.29  | 3.29  | 5.31  | 22.6  | 3.31 | 3    |

|                  |    |      |     |      |      |      |      |      |      |
|------------------|----|------|-----|------|------|------|------|------|------|
| ZnO              | 90 | 90   | 120 | 3.29 | 3.29 | 5.31 | 14.0 | 3.30 | 48   |
| ZnO              | 90 | 90   | 120 | 3.29 | 3.29 | 5.31 | 20.0 | 3.25 | 48   |
| ZnO              | 90 | 90   | 120 | 3.29 | 3.29 | 5.31 | 26.0 | 3.22 | 48   |
| ZnO              | 90 | 90   | 120 | 3.29 | 3.29 | 5.31 | 50.0 | 3.11 | exp. |
| ZnO              | 90 | 90   | 120 | 3.29 | 3.29 | 5.31 | 53.4 | 3.35 | 49   |
| ZnO              | 90 | 90   | 120 | 3.29 | 3.29 | 5.31 | 43.4 | 3.19 | 50   |
| ZrO <sub>2</sub> | 90 | 99.2 | 90  | 5.19 | 5.24 | 5.38 | 40.0 | 5.04 | 3    |

\*exp.: Band gaps measured by UV-vis spectroscopic analysis in this study

Number of reference is corresponding to that in text

**Table S2. Applicability domain characterization for developed nano-QSPR model**

| Training Set                      |                   |                              |                              |                              |                                              |                  |                |                              |                   |                    |         |        |                    |
|-----------------------------------|-------------------|------------------------------|------------------------------|------------------------------|----------------------------------------------|------------------|----------------|------------------------------|-------------------|--------------------|---------|--------|--------------------|
| Metal oxide                       | BETA-standardized | D <sup>2</sup> -standardized | H <sub>F</sub> -standardized | V <sub>2</sub> -standardized | E <sub>Fermi</sub> <sup>-</sup> standardized | TFW-standardized | R-standardized | E <sub>T</sub> -standardized | DENC-standardized | XCENC-standardized | AVERAGE | STDEV  | AVERAGE +1.28STDEV |
| Al <sub>2</sub> O <sub>3</sub>    | 0.3995            | 0.6402                       | 2.8965                       | 0.2238                       | 0.7241                                       | 0.0561           | 0.0148         | 0.3893                       | 0.1578            | 0.0139             | 0.5516  | 0.8167 | 1.5970             |
| CeO <sub>2</sub> -1               | 0.3995            | 0.4826                       | 0.0280                       | 0.0280                       | 0.4048                                       | 0.1804           | 0.8010         | 0.5736                       | 0.3484            | 0.4753             | 0.3722  | 0.2288 | 0.6650             |
| CeO <sub>2</sub> -2               | 0.3995            | 1.1771                       | 0.0280                       | 0.0280                       | 0.4048                                       | 0.1804           | 0.8010         | 0.5736                       | 0.3484            | 0.4753             | 0.4416  | 0.3333 | 0.8682             |
| CeO <sub>2</sub> -3               | 0.3995            | 2.8498                       | 0.0280                       | 0.0280                       | 0.4048                                       | 0.1804           | 0.8010         | 0.5736                       | 0.3484            | 0.4753             | 0.6089  | 0.7804 | 1.6077             |
| Cr <sub>2</sub> O <sub>3</sub> -1 | 0.3995            | 0.6131                       | 0.8364                       | 0.3126                       | 0.8111                                       | 0.6370           | 0.0148         | 1.3924                       | 0.2193            | 0.1786             | 0.5415  | 0.3852 | 1.0345             |
| Cu <sub>2</sub> O-1               | 0.3995            | 0.8305                       | 1.0666                       | 0.4156                       | 0.0039                                       | 0.7675           | 0.8010         | 1.9253                       | 3.4123            | 1.4792             | 1.1101  | 0.9276 | 2.2975             |
| Fe <sub>3</sub> O <sub>4</sub> -1 | 0.3995            | 0.4826                       | 0.2296                       | 1.0201                       | 0.4074                                       | 0.9465           | 0.4203         | 3.7281                       | 2.1972            | 1.6076             | 1.1439  | 1.0464 | 2.4834             |
| Ga <sub>2</sub> O <sub>3</sub> -1 | 3.0522            | 0.6412                       | 0.4689                       | 0.8796                       | 1.2124                                       | 0.8372           | 0.0148         | 0.3459                       | 0.1090            | 0.2095             | 0.7771  | 0.8384 | 1.8502             |
| Ga <sub>2</sub> O <sub>3</sub> -2 | 3.0522            | 3.1351                       | 0.4689                       | 0.8796                       | 1.2124                                       | 0.8372           | 0.0148         | 0.3459                       | 0.1090            | 0.2095             | 1.0265  | 1.0931 | 2.4256             |
| HfO <sub>2</sub> -1               | 1.9225            | 0.6462                       | 1.8193                       | 0.0755                       | 0.3906                                       | 0.6409           | 0.8010         | 0.4266                       | 0.7110            | 0.5899             | 0.8024  | 0.5685 | 1.5300             |
| In <sub>2</sub> O <sub>3</sub> -1 | 0.3995            | 0.5650                       | 0.4947                       | 1.9048                       | 0.5893                                       | 1.5153           | 0.0148         | 0.3224                       | 0.4003            | 1.1509             | 0.7357  | 0.5632 | 1.4566             |
| La <sub>2</sub> O <sub>3</sub> -1 | 0.3995            | 0.6205                       | 0.9077                       | 0.5582                       | 0.7149                                       | 0.4778           | 0.0148         | 0.2401                       | 0.8432            | 2.0528             | 0.6830  | 0.5233 | 1.3527             |
| MgO-1                             | 0.3995            | 0.1644                       | 0.0202                       | 0.4393                       | 0.5084                                       | 0.9339           | 1.6417         | 1.3465                       | 1.4933            | 1.0546             | 0.8002  | 0.5439 | 1.4963             |
| Mn <sub>2</sub> O <sub>3</sub> -1 | 0.3995            | 0.6209                       | 0.0129                       | 1.3995                       | 0.5045                                       | 0.7409           | 0.0148         | 1.1922                       | 0.3090            | 0.4396             | 0.5634  | 0.4294 | 1.1130             |
| NiO-1                             | 0.3995            | 1.2828                       | 1.0837                       | 0.4727                       | 1.5137                                       | 1.6062           | 1.6417         | 0.4772                       | 0.4885            | 0.3975             | 0.9363  | 0.5125 | 1.5923             |
| NiO-2                             | 0.3995            | 0.4703                       | 1.0837                       | 0.4727                       | 1.5137                                       | 1.6062           | 1.6417         | 0.4772                       | 0.4885            | 0.3975             | 0.8551  | 0.5155 | 1.5149             |
| NiO-4                             | 0.3995            | 0.4151                       | 1.0837                       | 0.4727                       | 1.5137                                       | 1.6062           | 1.6417         | 0.4772                       | 0.4885            | 0.3975             | 0.8496  | 0.5199 | 1.5150             |
| NiO-5                             | 0.3995            | 0.4930                       | 1.0837                       | 0.4727                       | 1.5137                                       | 1.6062           | 1.6417         | 0.4772                       | 0.4885            | 0.3975             | 0.8574  | 0.5138 | 1.5151             |
| NiO-6                             | 0.3995            | 0.5979                       | 1.0837                       | 0.4727                       | 1.5137                                       | 1.6062           | 1.6417         | 0.4772                       | 0.4885            | 0.3975             | 0.8678  | 0.5073 | 1.5172             |

|                                   |        |        |        |        |        |        |        |        |        |        |        |        |        |
|-----------------------------------|--------|--------|--------|--------|--------|--------|--------|--------|--------|--------|--------|--------|--------|
| Sb <sub>2</sub> O <sub>3</sub> -1 | 0.3995 | 0.4770 | 0.9059 | 4.3114 | 0.0178 | 1.8456 | 0.0148 | 0.6620 | 1.3169 | 0.8049 | 1.0756 | 1.2023 | 2.6145 |
| SnO <sub>2</sub> -1               | 0.3995 | 0.5205 | 0.7629 | 0.2157 | 0.2892 | 0.8889 | 0.8010 | 0.4689 | 0.6904 | 1.8074 | 0.6844 | 0.4305 | 1.2354 |
| SnO <sub>2</sub> -3               | 0.3995 | 0.2987 | 0.7629 | 0.2157 | 0.2892 | 0.8889 | 0.8010 | 0.4689 | 0.6904 | 1.8074 | 0.6623 | 0.4439 | 1.2304 |
| SnO <sub>2</sub> -5               | 0.3995 | 1.0798 | 0.7629 | 0.2157 | 0.2892 | 0.8889 | 0.8010 | 0.4689 | 0.6904 | 1.8074 | 0.7404 | 0.4417 | 1.3058 |
| SnO <sub>2</sub> -6               | 0.3995 | 0.6205 | 0.7629 | 0.2157 | 0.2892 | 0.8889 | 0.8010 | 0.4689 | 0.6904 | 1.8074 | 0.6944 | 0.4277 | 1.2419 |
| TiO <sub>2</sub> -a-1             | 0.3995 | 0.5678 | 0.2672 | 0.6028 | 1.6847 | 0.6854 | 0.8010 | 0.4793 | 0.6452 | 0.3098 | 0.6443 | 0.3818 | 1.1329 |
| TiO <sub>2</sub> -b-1             | 0.3995 | 0.2680 | 0.8859 | 0.0483 | 1.4179 | 0.4829 | 0.8010 | 0.4753 | 0.7877 | 0.3097 | 0.5876 | 0.3733 | 1.0654 |
| TiO <sub>2</sub> -r-1             | 0.3995 | 0.6419 | 0.6315 | 0.2799 | 1.1793 | 0.3855 | 0.8010 | 0.4882 | 0.8533 | 0.3087 | 0.5969 | 0.2700 | 0.9425 |
| WO <sub>3</sub> -1                | 0.0414 | 0.6334 | 0.2382 | 0.0103 | 1.7081 | 0.8903 | 1.6169 | 0.5189 | 0.6150 | 0.0057 | 0.6278 | 0.5908 | 1.3840 |
| ZnO-1                             | 0.3995 | 0.6275 | 1.1849 | 0.8082 | 1.5343 | 0.8892 | 1.6417 | 1.3457 | 1.5188 | 0.8894 | 1.0839 | 0.4013 | 1.5976 |
| ZrO <sub>2</sub> -1               | 1.9185 | 0.6320 | 1.7784 | 0.0560 | 0.6278 | 0.5906 | 0.8010 | 0.5188 | 0.2860 | 1.2868 | 0.8496 | 0.5847 | 1.5981 |

### Validation Set

| NAME                              | BETA-<br>standardized | D <sup>2</sup> -<br>standardized | H <sub>F</sub> -<br>standardized | V <sub>2</sub> -<br>standardized | E <sub>Fermi</sub> -<br>standardized | TFW-<br>standardized | R-<br>standardized | E <sub>T</sub> -<br>standardized | DENC-<br>standardized | XCENC-<br>standardized | AVER-<br>AGE | STDE<br>V | AVERAGE<br>+1.28STDEV |
|-----------------------------------|-----------------------|----------------------------------|----------------------------------|----------------------------------|--------------------------------------|----------------------|--------------------|----------------------------------|-----------------------|------------------------|--------------|-----------|-----------------------|
| Cr <sub>2</sub> O <sub>3</sub> -2 | 0.3995                | 0.6306                           | 0.8364                           | 0.3126                           | 0.8111                               | 0.6370               | 0.0148             | 1.3924                           | 0.2193                | 0.1786                 | 0.5432       | 0.3855    | 1.0367                |
| Cu <sub>2</sub> O-2               | 0.3995                | 0.3550                           | 1.0666                           | 0.4156                           | 0.0039                               | 0.7675               | 0.8010             | 1.9253                           | 3.4123                | 1.4792                 | 1.0626       | 0.9526    | 2.2819                |
| Cu <sub>2</sub> O-3               | 0.3995                | 0.0098                           | 1.0666                           | 0.4156                           | 0.0039                               | 0.7675               | 0.8010             | 1.9253                           | 3.4123                | 1.4792                 | 1.0281       | 0.9834    | 2.2868                |
| Cu <sub>2</sub> O-4               | 0.3995                | 0.5877                           | 1.0666                           | 0.4156                           | 0.0039                               | 0.7675               | 0.8010             | 1.9253                           | 3.4123                | 1.4792                 | 1.0859       | 0.9377    | 2.2862                |
| Fe <sub>2</sub> O <sub>3</sub> -1 | 0.3995                | 0.6444                           | 0.0916                           | 0.2514                           | 0.3448                               | 1.1364               | 0.0148             | 2.0181                           | 0.6478                | 1.0160                 | 0.6565       | 0.5720    | 1.3887                |
| NiO-3                             | 0.3995                | 0.1346                           | 1.0837                           | 0.4727                           | 1.5137                               | 1.6062               | 1.6417             | 0.4772                           | 0.4885                | 0.3975                 | 0.8215       | 0.5493    | 1.5246                |
| SnO <sub>2</sub> -2               | 0.3995                | 0.8305                           | 0.7629                           | 0.2157                           | 0.2892                               | 0.8889               | 0.8010             | 0.4689                           | 0.6904                | 1.8074                 | 0.7154       | 0.4287    | 1.2642                |
| SnO <sub>2</sub> -4               | 0.3995                | 0.2274                           | 0.7629                           | 0.2157                           | 0.2892                               | 0.8889               | 0.8010             | 0.4689                           | 0.6904                | 1.8074                 | 0.6551       | 0.4502    | 1.2313                |
| TiO <sub>2</sub> -b-2             | 0.3995                | 0.5806                           | 0.8859                           | 0.0483                           | 1.4179                               | 0.4829               | 0.8010             | 0.4753                           | 0.7877                | 0.3097                 | 0.6189       | 0.3580    | 1.0771                |
| Y <sub>2</sub> O <sub>3</sub> -1  | 0.3995                | 0.5359                           | 4.3427                           | 2.0225                           | 1.2205                               | 0.1735               | 0.0148             | 0.2606                           | 2.1465                | 2.4678                 | 1.3584       | 1.3126    | 3.0385                |

**Table S3. Band gaps calculated by empirical equation**

| Metal oxide                    | $\alpha$ (°) | $\beta$ (°) | $\gamma$ (°) | $a$ (Å) | $b$ (Å) | $c$ (Å) | Size (nm) | $E_{g1}$ (eV) | $E_{g2}$ (eV) |
|--------------------------------|--------------|-------------|--------------|---------|---------|---------|-----------|---------------|---------------|
| Al <sub>2</sub> O <sub>3</sub> | 90           | 90          | 120          | 4.81    | 4.81    | 13.12   | 76.0      | 4.99          | 9.61          |
| CeO <sub>2</sub>               | 90           | 90          | 90           | 5.46    | 5.46    | 5.46    | 12.0      | 1.87          | 4.46          |
| CeO <sub>2</sub>               | 90           | 90          | 90           | 5.46    | 5.46    | 5.46    | 3.6       | 1.87          | 4.46          |
| CeO <sub>2</sub>               | 90           | 90          | 90           | 5.46    | 5.46    | 5.46    | 2.6       | 1.87          | 4.46          |
| Cr <sub>2</sub> O <sub>3</sub> | 90           | 90          | 120          | 4.58    | 4.58    | 14.72   | 26.5      | 2.75          | 3.77          |
| Cu <sub>2</sub> O              | 90           | 90          | 90           | 4.31    | 4.31    | 4.31    | 4.0       | 0.67          | 1.8           |
| Fe <sub>3</sub> O <sub>4</sub> | 90           | 90          | 90           | 8.04    | 8.04    | 8.04    | 12.0      | 1.59          | 2.68          |
| Ga <sub>2</sub> O <sub>3</sub> | 90           | 103.7       | 90           | 12.50   | 3.10    | 5.92    | 65.0      | 2.35          | 4.86          |
| Ga <sub>2</sub> O <sub>3</sub> | 90           | 103.7       | 90           | 12.50   | 3.10    | 5.92    | 2.5       | 2.35          | 4.86          |
| HfO <sub>2</sub>               | 90           | 99.216      | 90           | 5.14    | 5.19    | 5.31    | 200.0     | 3.82          | 7.16          |
| In <sub>2</sub> O <sub>3</sub> | 90           | 90          | 90           | 10.35   | 10.35   | 10.35   | 17.0      | 2.37          | 4.03          |
| La <sub>2</sub> O <sub>3</sub> | 90           | 90          | 120          | 3.94    | 3.94    | 6.18    | 30.0      | 2.82          | 9.5           |
| MgO                            | 90           | 90          | 90           | 4.25    | 4.25    | 4.25    | 7.0       | 1.86          | 6.68          |
| Mn <sub>2</sub> O <sub>3</sub> | 90           | 90          | 90           | 9.03    | 9.03    | 9.03    | 30.2      | 1.82          | 3.08          |
| NiO                            | 90           | 90          | 90           | 4.16    | 4.16    | 4.16    | 3.5       | 0.66          | 2.37          |
| NiO                            | 90           | 90          | 90           | 4.16    | 4.16    | 4.16    | 4.6       | 0.66          | 2.37          |
| NiO                            | 90           | 90          | 90           | 4.16    | 4.16    | 4.16    | 10.1      | 0.66          | 2.37          |
| NiO                            | 90           | 90          | 90           | 4.16    | 4.16    | 4.16    | 12.4      | 0.66          | 2.37          |
| NiO                            | 90           | 90          | 90           | 4.16    | 4.16    | 4.16    | 22.0      | 0.66          | 2.37          |
| Sb <sub>2</sub> O <sub>3</sub> | 90           | 90          | 90           | 5.18    | 16.61   | 5.51    | 11.8      | 2.82          | 2.6           |
| SnO <sub>2</sub>               | 90           | 90          | 90           | 4.83    | 4.83    | 3.24    | 4.5       | 1.00          | 3.76          |
| SnO <sub>2</sub>               | 90           | 90          | 90           | 4.83    | 4.83    | 3.24    | 5.0       | 1.00          | 3.76          |
| SnO <sub>2</sub>               | 90           | 90          | 90           | 4.83    | 4.83    | 3.24    | 3.7       | 1.00          | 3.76          |
| SnO <sub>2</sub>               | 90           | 90          | 90           | 4.83    | 4.83    | 3.24    | 30.0      | 1.00          | 3.76          |
| TiO <sub>2</sub> -a            | 90           | 90          | 90           | 3.82    | 3.82    | 9.70    | 17.3      | 2.13          | —             |
| TiO <sub>2</sub> -b            | 90           | 90          | 90           | 9.28    | 5.52    | 5.19    | 7.9       | 2.80          | 4.99          |
| TiO <sub>2</sub> -r            | 90           | 90          | 90           | 4.66    | 4.66    | 2.97    | 70.0      | 1.15          | —             |
| WO <sub>3</sub>                | 90           | 91.75       | 90           | 5.39    | 5.36    | 7.84    | 42.0      | 1.58          | 2.68          |
| ZnO                            | 90           | 90          | 120          | 3.29    | 3.29    | 5.31    | 35.0      | 0.55          | 3.41          |
| ZrO <sub>2</sub>               | 90           | 99.2        | 90           | 5.19    | 5.24    | 5.38    | 40.0      | 3.77          | 8.38          |

\* $E_{g1}$  values were computed according to empirical equation using computed heat of formation.

\* $E_{g2}$  values were computed according to empirical equation using experimental heat of formation.

**Table S4. Comparison of computed and experimental values for heat of formation**

| Name                           | $\square \Delta H_{\text{exp.}}$ (cal/mol) | $\square \Delta H_{\text{cal}}$ (cal/mol) |
|--------------------------------|--------------------------------------------|-------------------------------------------|
| Al <sub>2</sub> O <sub>3</sub> | 399090                                     | 265782                                    |
| CeO <sub>2</sub>               | 233000                                     | 114800                                    |
| Cr <sub>2</sub> O <sub>3</sub> | 269700                                     | 63573                                     |
| Cu <sub>2</sub> O              | 39840                                      | -26726                                    |
| Fe <sub>2</sub> O <sub>3</sub> | 196500                                     | 112108                                    |
| Fe <sub>3</sub> O <sub>4</sub> | 267125                                     | 124930                                    |
| Ga <sub>2</sub> O <sub>3</sub> | 260550                                     | 112344                                    |
| HfO <sub>2</sub>               | 266910                                     | 181544                                    |
| In <sub>2</sub> O <sub>3</sub> | 222500                                     | 114771                                    |
| La <sub>2</sub> O <sub>3</sub> | 458000                                     | 211066                                    |
| MgO                            | 143840                                     | 57091                                     |
| Mn <sub>2</sub> O <sub>3</sub> | 229053                                     | 121907                                    |
| NiO                            | 58400                                      | 28623                                     |
| Sb <sub>2</sub> O <sub>3</sub> | 133400                                     | 149498                                    |
| SnO <sub>2</sub>               | 138800                                     | -40043                                    |
| TiO <sub>2</sub> -a            | 363260                                     | 102261                                    |
| TiO <sub>2</sub> -b            | 218000                                     | 139569                                    |
| WO <sub>3</sub>                | 200840                                     | 92490                                     |
| Y <sub>2</sub> O <sub>3</sub>  | 455001                                     | 382593                                    |
| ZnO                            | 83170                                      | -41090                                    |
| ZrO <sub>2</sub>               | 288200                                     | 179955                                    |

\* $\Delta H_{\text{exp}}$ : Experimental heat of formation of unit cell.

\* $\Delta H_{\text{cal}}$ : Computed heat of formation of unit cell.

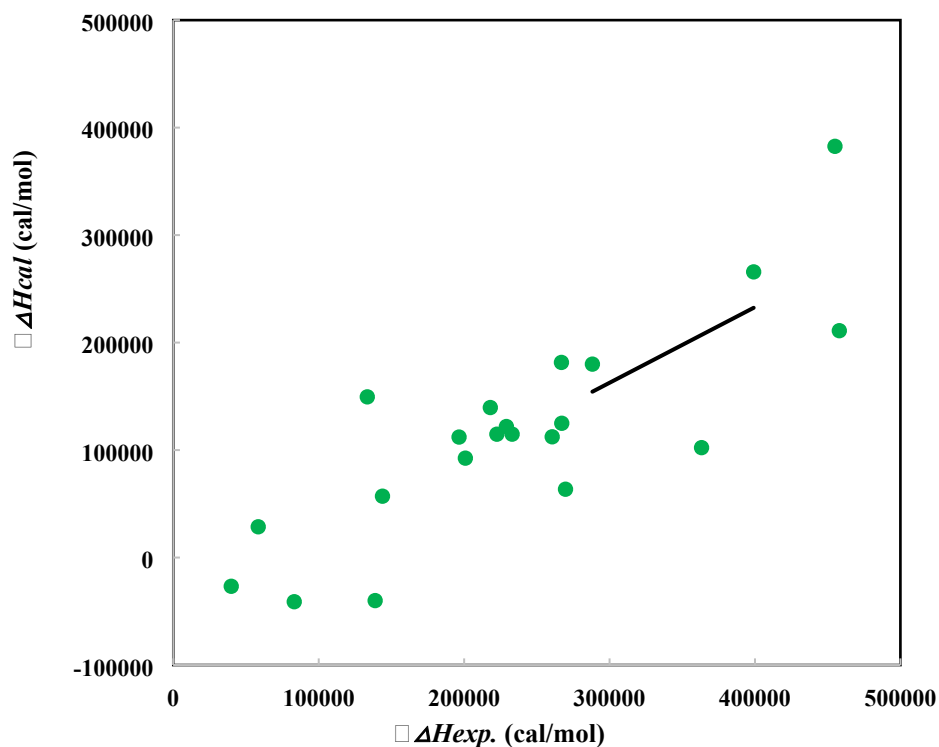

**Figure S1. Relationship between computed and experimental values for heat of formation**

**References:**

- [1] Portier, J., Campet, G., Kwon, C. W., Etourneau, J., Subramanian, M. A. Relationships between optical band gap and thermodynamic properties of binary oxides. *International Journal of Inorganic Materials*, 2001, 3(7), 1091-1094.
- [2] Appendix-Standard Thermodynamic Properties of Chemical Substance. 2000, CRC Handbook of Chemistry and Physics, CRC PRESS LLC.



**Table S5. Standard error of regression coefficients of the QSPR model**

| <b>Descriptors</b> | <b>Coefficient</b> | <b>Standard error</b> |
|--------------------|--------------------|-----------------------|
| $H_F$              | 0.553              | 0.211                 |
| $BETA$             | 0.0806             | 0.050                 |
| $D^{-2}$           | 1.09               | 6.51                  |
| $V2$               | -0.0159            | 0.0917                |
| $E_{Fermi}$        | 0.180              | 0.096                 |
| $TFW$              | -2.23              | 1.43                  |
| $R$                | 0.803              | 0.611                 |
| $E_T$              | 0.00469            | 0.0009                |
| $DENC$             | -0.000305          | 0.00147               |
| $XCENC$            | -0.00403           | 0.00498               |
